# Supplementary material
Source: ML conference proceedings conference paper supplement (https://openreview.net/forum?id=VtJqMs9ig20)
Supplement: supplementary_material [file attachment]

## 403 A Proof of Theorem 1

404 **Theorem.** Suppose that the EV's reaction depends on the future traffic unidirectionally, then we  
 405 have  $\mathbb{P}(Y^{EV}, \mathbf{Y}^{OV} | Coll = True, X) \propto \mathbb{P}(\mathbf{Y}^{OV} | X) \mathbb{P}(Y^{EV} | \mathbf{Y}^{OV}, X_t) \mathbb{P}(Coll = True | Y^{EV}, \mathbf{Y}^{OV})$ .

406 *Proof.* According to Bayes theorem, we have

$$\mathbb{P}(Y^{EV}, \mathbf{Y}^{OV} | Coll = True, X) \propto \mathbb{P}(Coll = True | Y^{EV}, \mathbf{Y}^{OV}, X) \mathbb{P}(Y^{EV}, \mathbf{Y}^{OV}, X) \quad (\text{A.1})$$

407 Since  $Coll$  merely depends on  $Y_{t:t+l}^{EV}$  and  $\mathbf{Y}_{t:t+l}^{OV}$ , (A.1) is equivalent to

$$\mathbb{P}(Y^{EV}, \mathbf{Y}^{OV} | Coll = True, X) \propto \mathbb{P}(Coll = True | Y^{EV}, \mathbf{Y}^{OV}) \mathbb{P}(Y^{EV}, \mathbf{Y}^{OV}, X) \quad (\text{A.2})$$

408 Suppose that the AV's reaction depends on the future traffic unidirectionally; continuing with Bayes  
 409 theorem, we have

$$\begin{aligned} \mathbb{P}(Y^{EV}, \mathbf{Y}^{OV} | Coll = True, X) \\ \propto \mathbb{P}(Coll = True | Y^{EV}, \mathbf{Y}^{OV}) \mathbb{P}(Y^{EV} | \mathbf{Y}^{OV}, X) \mathbb{P}(\mathbf{Y}^{OV}, X) \\ \propto \mathbb{P}(Coll = True | Y^{EV}, \mathbf{Y}^{OV}) \mathbb{P}(Y^{EV} | \mathbf{Y}^{OV}, X) \mathbb{P}(\mathbf{Y}^{OV} | X) \mathbb{P}(X) \end{aligned} \quad (\text{A.3})$$

410 Since the past state  $X$  is given, we can omit the last item  $\mathbb{P}(X)$  in (A.3). Therefore, it holds that

$$\mathbb{P}(Y^{EV}, \mathbf{Y}^{OV} | Coll = True, X) \propto \mathbb{P}(\mathbf{Y}^{OV} | X) \mathbb{P}(Y^{EV} | \mathbf{Y}^{OV}, X) \mathbb{P}(Coll = True | Y^{EV}, \mathbf{Y}^{OV}) \quad (\text{A.4})$$

411 The proof of Theorem 1 is completed.  $\square$

## 412 B Hyper-parameter Settings

| Table 3: CAT            |       | Table 4: TD3               |       | Table 5: DenseTNT and M2I |       |
|-------------------------|-------|----------------------------|-------|---------------------------|-------|
| Hyper-parameter         | Value | Hyper-parameter            | Value | Hyper-parameter           | Value |
| Scenario Horizon $T$    | 9s    | Discounted Factor $\gamma$ | 0.99  | Train Batch size          | 256   |
| History Horizon $t$     | 1s    | Train Batch Size           | 256   | Train Epoches             | 30    |
| # of OV candidates $M$  | 32    | Critic Learning Rate       | 3E-4  | Sub Graph Depth           | 3     |
| # of EV candidates $N$  | 5     | Actor Learning Rate        | 3E-4  | Global Graph Depth        | 1     |
| Penalty Factor $\alpha$ | 0.99  | Policy Delay               | 2     | NMS Threshold             | 7.2   |
| Policy Training Steps   | 10E6  | Target Network $\tau$      | 0.005 | Number of Mode            | 32    |

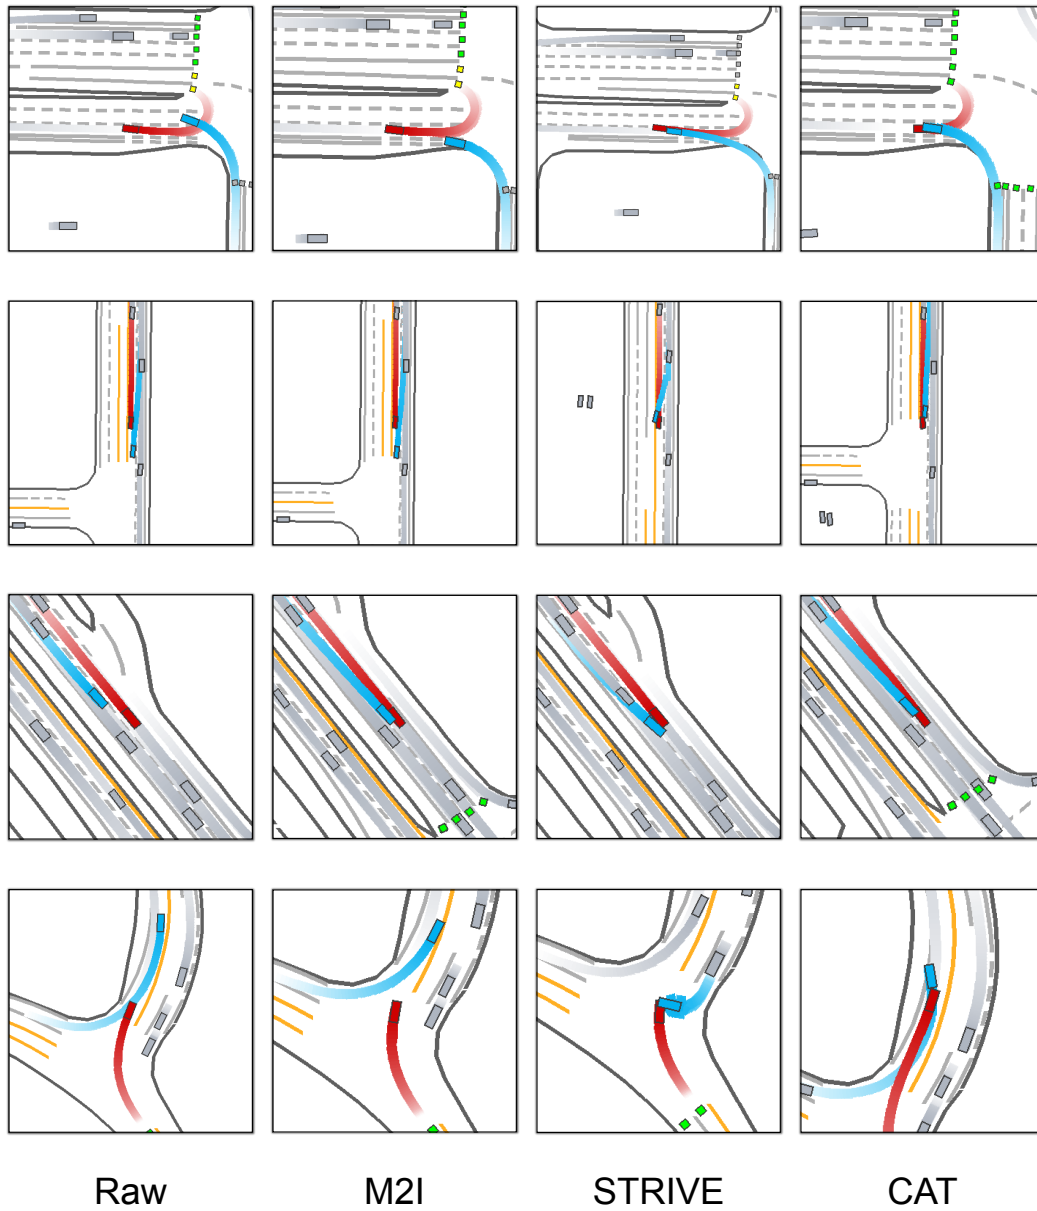

Figure 6: Comparing the different scenario generation methods. M2I and CAT both can determine the object of interest while STRIVE select the closest vehicle as the opponent. The red car is the ego vehicle and the blue car is the opponent vehicle.

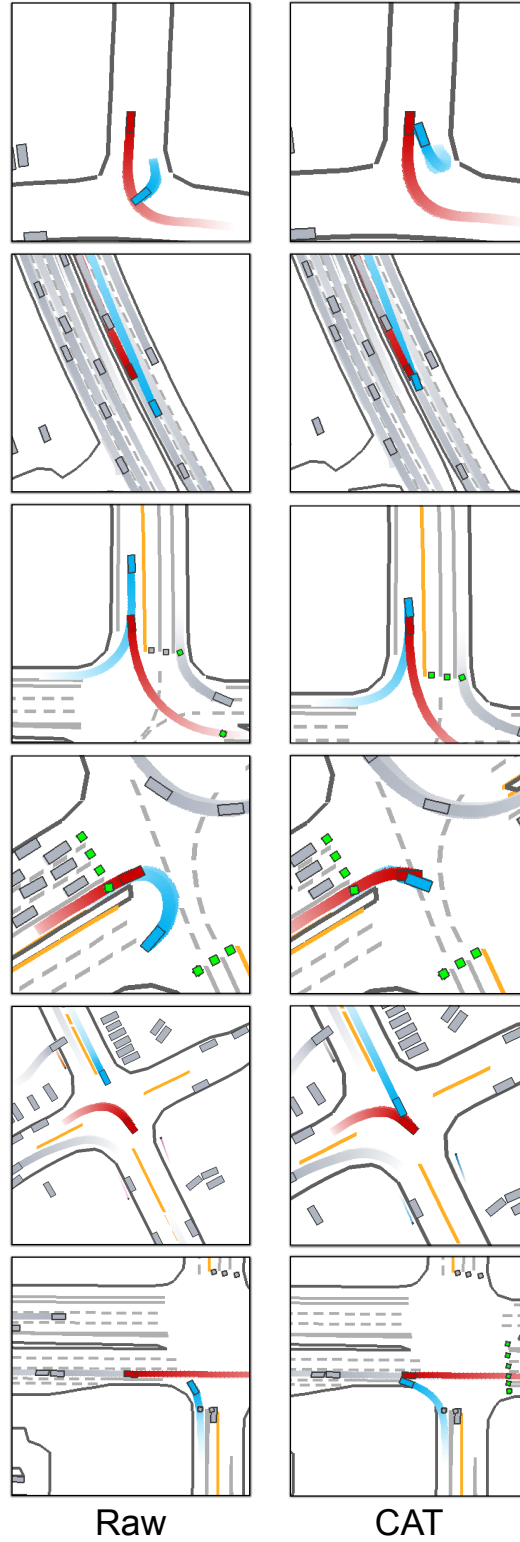

Figure 7: More comparison between the original scenarios in raw datasets and the safety-critical scenarios generated by our method. The red car is ego vehicle and the blue car is the opponent vehicle.
